# Supplementary material
Source: Springer Nature journal article supplement (https://www.springermedizin.de/resource/supplementary/12958_2008_417_MOESM6_ESM.pdf/9567834)

**A.**

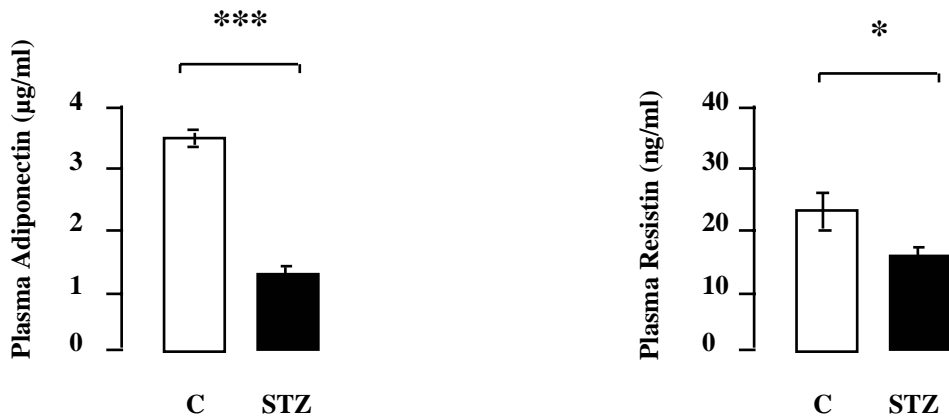

**B. Ovary**

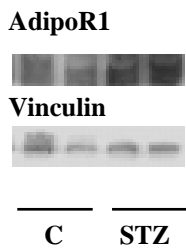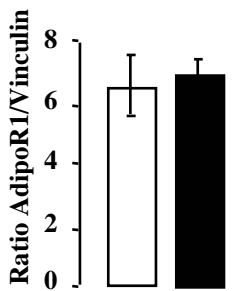

**C. Muscle**

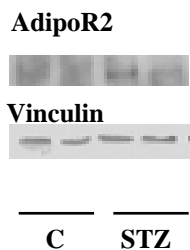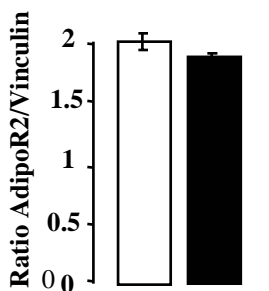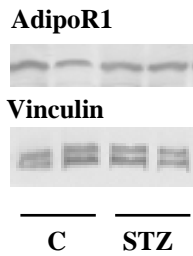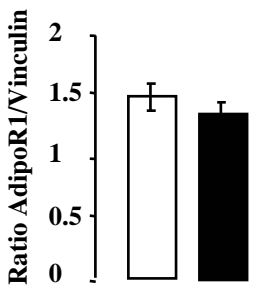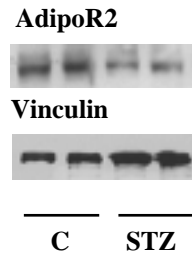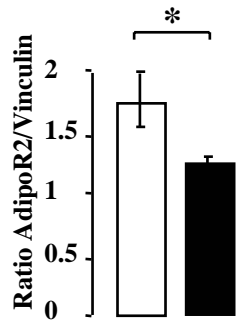

**D. Liver**

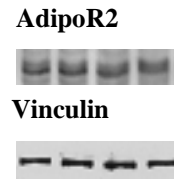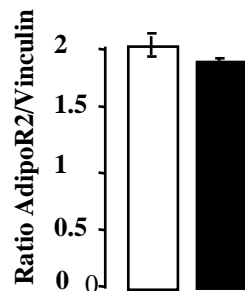

Supplement: MOESM6 [file 9567834]
